# Supplementary material for: Antibiotic treatment modulates protein components of cytotoxic outer membrane vesicles of multidrug-resistant clinical strain, Acinetobacter baumannii DU202
Source: PubMed Central journal article supplement (PMC6118003; doi:10.1186/s12014-018-9204-2), 2018-08-31

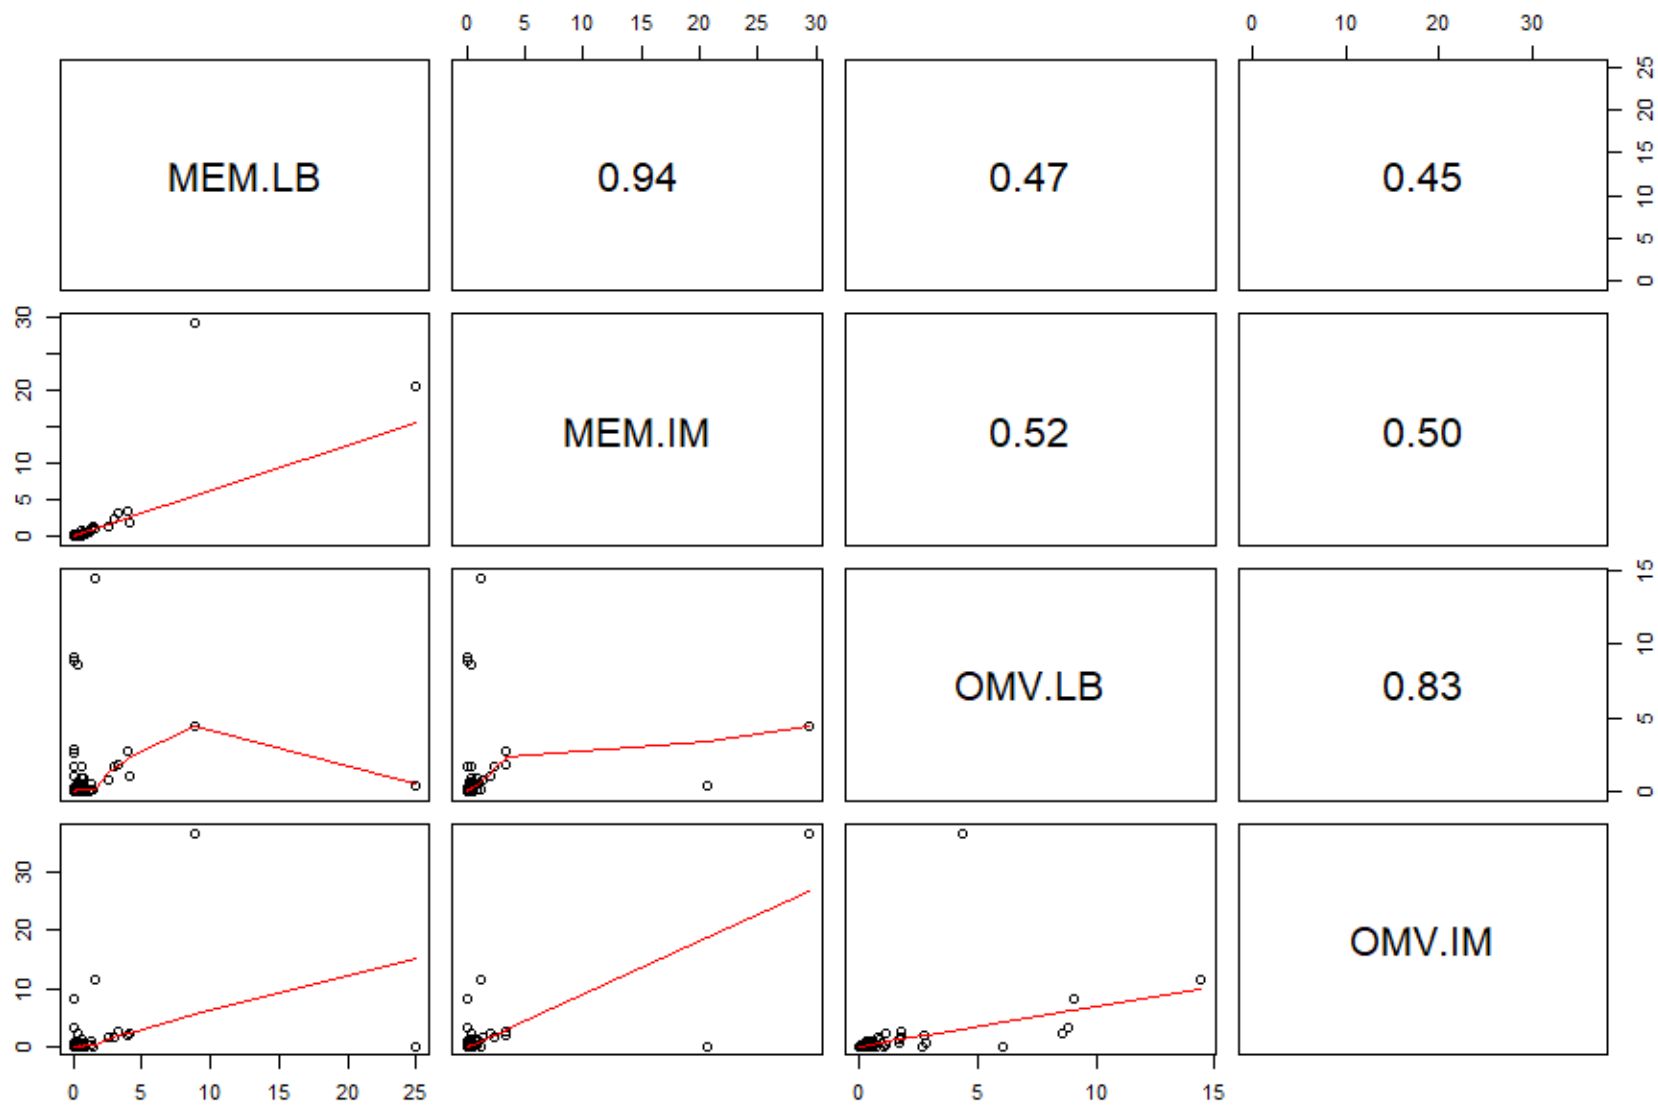

Supplement: 12014_2018_9204_MOESM1_ESM.pdf [file 12014_2018_9204_MOESM1_ESM.pdf]
